# Supplementary material
Source: Springer Nature journal article supplement (https://www.springermedizin.de/resource/supplementary/12985_2013_2231_MOESM6_ESM.pdf/9606322)

Immune tolerance  
High infectivity

Immune elimination  
chronic hepatitis

Low-viraemic  
HBsAg carrier

HBV DNA

$>10^7$  IU/ml

HBsAg

$>30,000$  IU/ml

HBeAg

highly positive

$<3000$  IU/ml

$<10^4$  IU/ml

negative

ALT

normal

normal

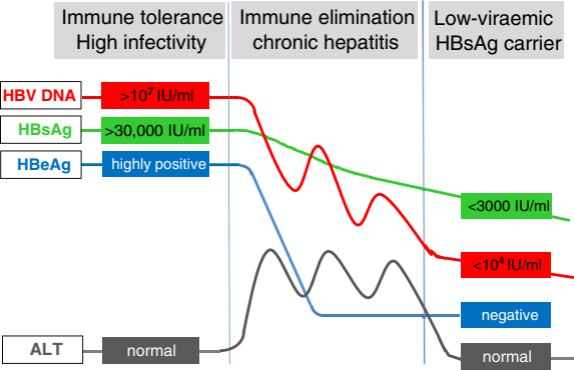

Supplement: MOESM6 [file 9606322]
